# Supplementary material for: Actual partial pressure of Se vapor in a closed selenization system: quantitative estimation and impact on solution-processed chalcogenide thin-film solar cells
Source: Royal Society of Chemistry journal article supplement (doi:10.1039/c6ta00145a), 2016-01-01
Supplement: c6ta00145a1.pdf [file c6ta00145a1.pdf]

Supporting Information

## **Actual partial pressure of Se vapor in a closed selenization system: quantitative estimation and impact on solution-processed, chalcogenide thin-film solar cells**

*Jeong Hyeob Han,<sup>a,b</sup> Shanza Rehan,<sup>a,b</sup> Dong Gwon Moon,<sup>a,c</sup> Ara Cho,<sup>a</sup> Jihye Gwak,<sup>a</sup> Kyung Hoon Yoon,<sup>a</sup> Seung Kyu Ahn,<sup>a</sup> Jae Ho Yun,<sup>a</sup> Young Joo Eo,<sup>a,\*</sup> and SeJin Ahn<sup>a,b,\*</sup>*

<sup>a</sup> Photovoltaic Laboratory, Korea Institute of Energy Research, Daejeon 305-343, Korea.

<sup>b</sup> Department of Renewable Energy Engineering, Korea University of Science & Technology (UST), Daejeon 305-350, Korea.

<sup>c</sup> Department of Materials Science and Engineering, Yonsei University, Seoul 120-749, Korea.

## S1. Estimation of the actual partial pressure of Se vapor during selenization

1) Original model developed by Scragg.<sup>1</sup>

When the reaction chamber is filled with nitrogen and sealed,  $n_N$  moles of nitrogen are contained in the total volume  $V_T$ . Before evaporation of Se, the number of moles of gas molecules,  $n_B$ , inside the container of volume  $V_B$  is given by:

$$n_B = n_N \frac{V_B}{V_T}$$

The number of moles of gas molecules outside the container,  $n_C$ , is given by:

$$n_C = n_N \frac{V_C}{V_T}$$

where  $V_C$  is the volume of the outside reaction chamber. Note that we conserve the total volume and number of gas molecules:

$$\begin{aligned} V_C + V_B &= V_T \\ n_C + n_B &= n_T \end{aligned}$$

After the Se has completely vaporized, the concentration of gas molecules inside the container has risen by an amount  $n_{Se}$ :

$$n'_B = n_N \frac{V_B}{V_T} + n_{Se}$$

The internal pressure is now greater than the external pressure. This causes a fraction  $F$  of the gas molecules inside the container to move out, after which the pressures are equal. Then, we have:

$$n_{B,eq} = (1 - F) \left( n_N \frac{V_B}{V_T} + n_{Se} \right)$$

and

$$n_{C,eq} = n_N \frac{V_C}{V_T} + F \left( n_N \frac{V_B}{V_T} + n_{Se} \right)$$

Now, writing the internal and external pressures after equilibration explicitly, and making them equal, we have:

$$P_B = RT \left( 1 - F \right) \left( \frac{n_N}{V_T} + \frac{n_{Se}}{V_B} \right) = P_C = RT \left( \frac{n_N}{V_T} + F \left( \frac{n_N V_B}{V_T V_C} + \frac{n_{Se}}{V_C} \right) \right)$$

where  $R$  is the gas constant (8.314 J mol K<sup>-1</sup>) and  $T$  is the selenization temperature. Rearranging for  $F$  and making the following substitutions of

$$P_{\text{Se,B}} = n_{\text{Se}} \frac{RT}{V_{\text{B}}}$$

which is the partial pressure of Se inside the container if all of the Se had remained inside it, and

$$P_{\text{N}} = n_{\text{N}} \frac{RT}{V_{\text{T}}} = P_{\text{N,RT}} \frac{T}{303}$$

where  $P_{\text{N}}$  is the background pressure of nitrogen at the selenization temperature and  $P_{\text{N,RT}}$  is the  $P_{\text{N}}$  at room temperature; we then obtain

$$F = \frac{P_{\text{Se,B}}}{\left(\frac{V_{\text{B}}}{V_{\text{C}}} + 1\right) (P_{\text{Se,B}} + P_{\text{N}})}$$

We can now calculate the actual partial pressure of Se inside the container after equilibration,  $P_{\text{Se,eqm}}$ :

$$\frac{P_{\text{Se,eqm}}}{P_{\text{Se,B}}} = (1 - F) = \frac{P_{\text{N}} + \frac{P_{\text{Se,B}} V_{\text{B}}}{V_{\text{T}}}}{P_{\text{N}} + P_{\text{Se,B}}}$$

## 2) A new model modified by the authors

The authors modified the original model, focusing on the following two points. First, the original model did not consider the pressure exerted by the lid of the graphite box, which will definitely suppress the escape of the internal Se. Thus, the original equilibration equation of  $P_{\text{B}} = P_{\text{C}}$  should be modified to

$$P_{\text{B}} = P_{\text{C}} + P_{\text{L}},$$

where  $P_{\text{L}}$  is the pressure originating from the weight of the lid.

The second issue is that, in actuality, some of Se vapor condenses on the wall of the outside chamber because the wall is water-cooled during the whole selenization process due to safety concerns. This will decrease  $P_{\text{C}}$ . The authors did observe a non-negligible quantity of solid Se condensed on the cold chamber wall after the selenization process. This is treated numerically by introducing an additional constant for the condensation ratio ( $C$ ), determining what portion of the gas molecules in the outside chamber re-condense at the cold wall. In this case, we have:

$$n_{\text{B,eq}} = (1 - F) \left( n_{\text{N}} \frac{V_{\text{B}}}{V_{\text{T}}} + n_{\text{Se}} \right)$$

and

$$n_{\text{C,eq}} = (1 - C) \left( n_{\text{N}} \frac{V_{\text{C}}}{V_{\text{T}}} + F \left( n_{\text{N}} \frac{V_{\text{B}}}{V_{\text{T}}} + n_{\text{Se}} \right) \right)$$

Because nitrogen molecules do not “condense” at the cold wall, a pressure drop corresponding to the nitrogen gas occurs due to the temperature drop at the wall. However, to avoid this complexity in deriving equations, we treated both the Se and nitrogen molecules as “condensing” at the cold wall, resulting in a pressure drop of the outside chamber.

Now, we can write the equations for the pressures inside and outside the graphite container as,

$$P_B = RT (1 - F) \left( \frac{n_N}{V_T} + \frac{n_{Se}}{V_B} \right)$$

and

$$P_C = RT(1 - C) \left( \frac{n_N}{V_T} + F \left( \frac{n_N V_B}{V_T V_C} + \frac{n_{Se}}{V_C} \right) \right)$$

Because  $P_B = P_C + P_L$ ,

$$RT(1 - F) \left( \frac{n_N}{V_T} + \frac{n_{Se}}{V_B} \right) = RT(1 - C) \left( \frac{n_N}{V_T} + F \left( \frac{n_N V_B}{V_T V_C} + \frac{n_{Se}}{V_C} \right) \right) + P_L$$

Arranging the above equation using the relation of  $P_{Se,B} = n_{Se} \frac{RT}{V_B}$  and  $P_N = n_N \frac{RT}{V_T} = P_{N,RT} \frac{T}{303}$  yields

$$F = \frac{P_{Se,B} + C \cdot P_N - P_L}{(P_N + P_{Se,B}) \left( (1 - C) \frac{V_B}{V_C} + 1 \right)}$$

Again, we can now calculate the actual partial pressure of Se inside the container after equilibration,  $P_{Se,eqm}$ , using  $F$  derived above:

$$\frac{P_{Se,eqm}}{P_{Se,B}} = (1 - F)$$

## S2. Comparison between the original model and the modified model

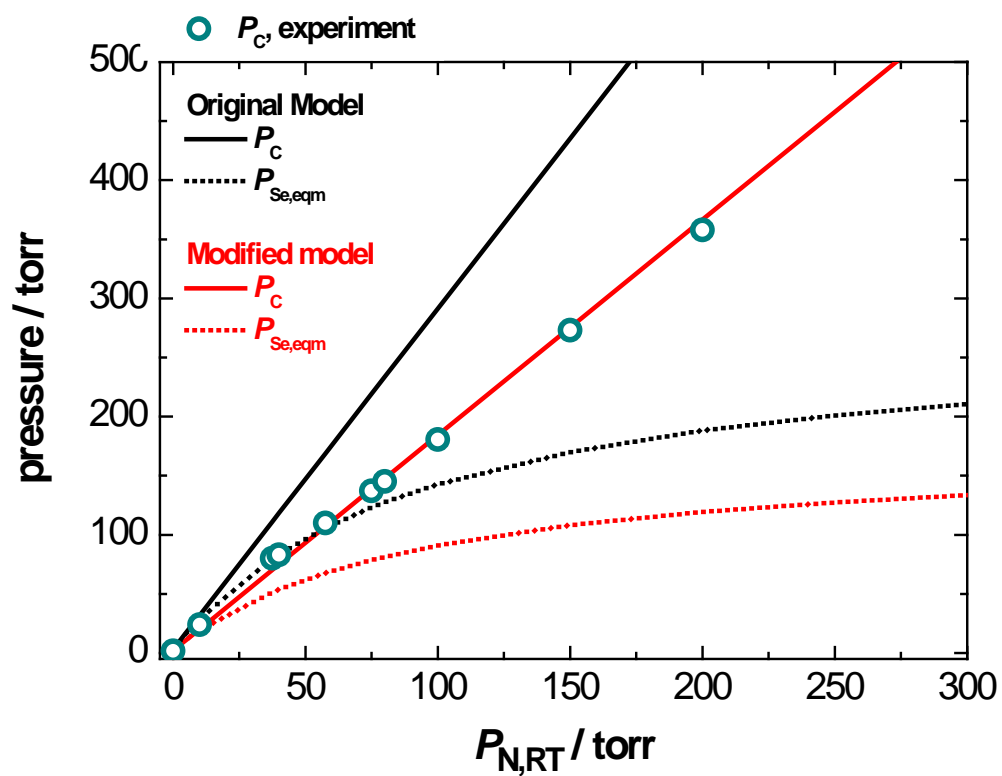

Fig. S2.  $P_C$  and  $P_{Se,eqm}$  values, as function of  $P_{N,RT}$ , estimated from the original model (black) and the modified model (red). Experimentally measured  $P_C$  was presented as a green dots. The initial Se amount was fixed at 0.2 g and the selenization temperature was 600 °C

### S3. Actual partial pressure of Se vapor ( $P_{\text{Se,eqm}}$ ) vs. the initial Se amount

Table S3. Actual partial pressure of Se vapor ( $P_{\text{Se,eqm}}$ ) as a function of the initial Se amount at various background pressures. The unit of  $P_{\text{Se,eqm}}$  is torr.

|                             |                    | Se amount / g |       |        |        |
|-----------------------------|--------------------|---------------|-------|--------|--------|
|                             |                    | 0.05          | 0.1   | 0.15   | 0.2    |
| $P_{\text{N,RT}} /$<br>torr | $4 \times 10^{-3}$ | 1.71          | 2.22  | 2.73   | 3.24   |
|                             | 0.4                | 2.35          | 2.88  | 3.39   | 3.90   |
|                             | 4                  | 7.39          | 8.39  | 9.09   | 9.69   |
|                             | 10                 | 14.08         | 16.92 | 18.40  | 19.44  |
|                             | 40                 | 28.01         | 41.01 | 48.65  | 53.78  |
|                             | 100                | 35.66         | 59.91 | 77.52  | 90.94  |
|                             | 400                | 41.43         | 78.47 | 111.70 | 141.93 |

## S4. Actual partial pressure of Se vapor ( $P_{\text{Se,eqm}}$ ) vs. the background pressure at room temperature

Table S4. Actual partial pressure of Se vapor ( $P_{\text{Se,eqm}}$ ) as a function of the background pressure at room temperature ( $P_{\text{N,RT}}$ ) with different initial amounts of Se. The unit of  $P_{\text{Se,eqm}}$  is torr.

|                     |     | Background pressure at RT ( $P_{\text{N,RT}}$ ) / torr |      |      |       |       |       |        |        |        |        |
|---------------------|-----|--------------------------------------------------------|------|------|-------|-------|-------|--------|--------|--------|--------|
|                     |     | $4 \times 10^{-3}$                                     | 0.04 | 0.4  | 4     | 40    | 80    | 100    | 150    | 200    | 400    |
| Se<br>amount<br>/ g | 0.1 | 2.22                                                   | 2.28 | 2.87 | 8.39  | 41.01 | 55.57 | 59.91  | 66.91  | 71.08  | 78.47  |
|                     | 0.2 | 3.24                                                   | 3.29 | 3.90 | 9.69  | 53.78 | 81.37 | 90.94  | 108.07 | 119.42 | 141.94 |
|                     | 0.3 | 4.26                                                   | 4.32 | 4.92 | 10.80 | 60.41 | 96/54 | 110.16 | 136.12 | 154.54 | 194.39 |

## S5. XRD data for the films selenized with different amounts of Se

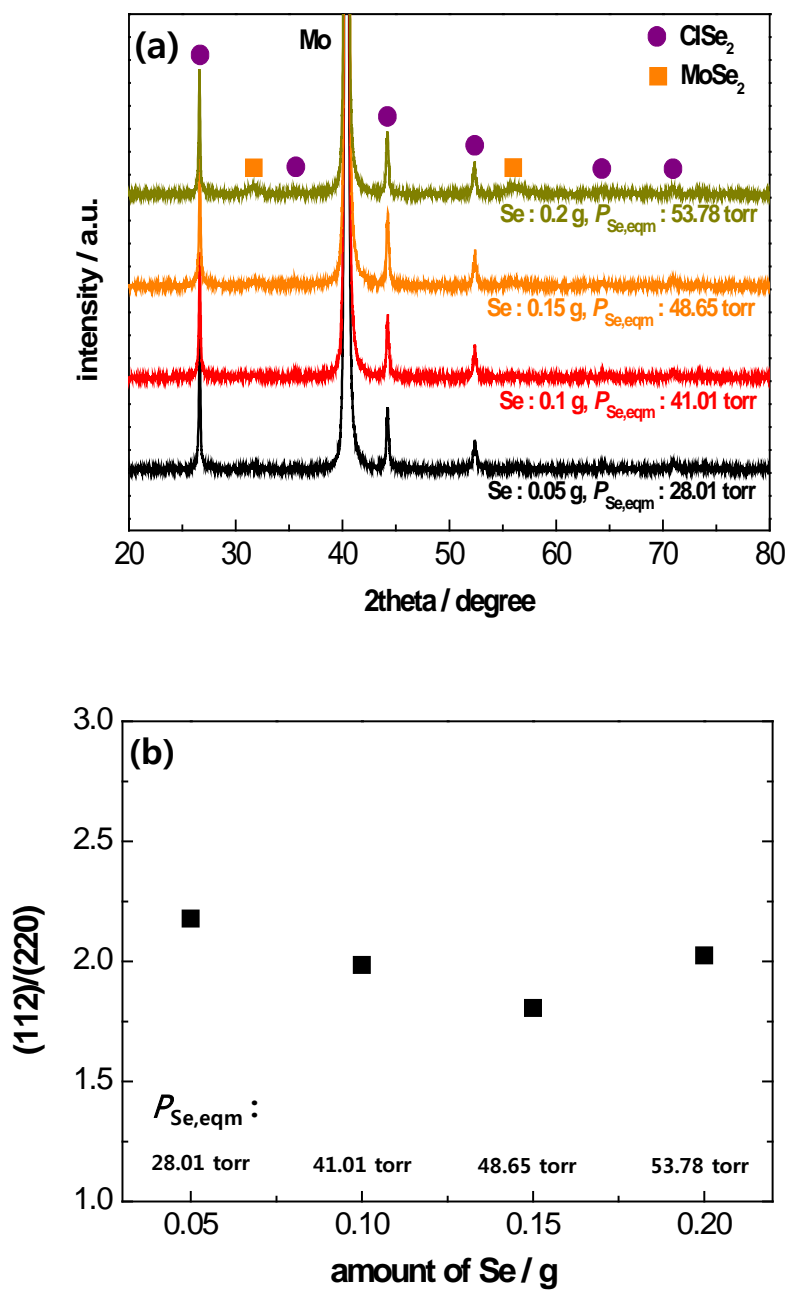

Fig. S5. (a) XRD patterns of the films selenized with different amounts Se, and (b) the intensity ratio of the (112) and (220) peaks.  $P_{\text{N,RT}}$  was 40 torr for all cases.



## S6. Comparison of the effects of $P_{Se,eqm}$ , resulted from different combination of the Se amount and $P_{N,RT}$ , on the film and device properties

Table S6. The amount of Se,  $P_{N,RT}$  and resulting  $P_{Se,eqm}$  values for the case A and B.

|                     | A    | B    |
|---------------------|------|------|
| amount of Se / g    | 0.2  | 0.08 |
| $P_{N,RT}$ / torr   | 40   | 400  |
| $P_{Se,eqm}$ / torr | 53.8 | 60.0 |

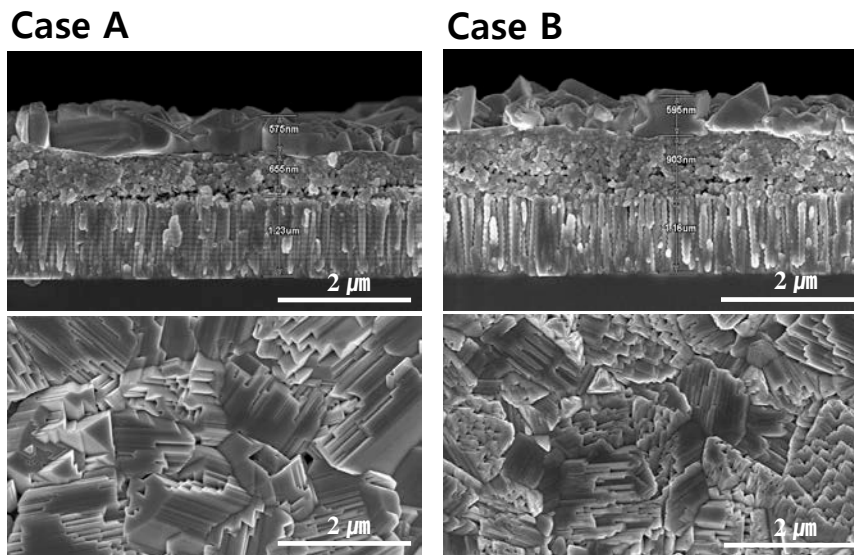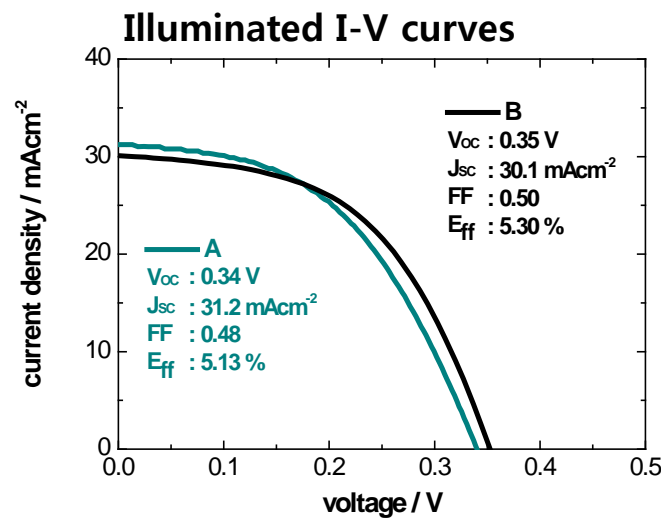

Fig. S6. SEM images of the selenized films and light illuminated I-V curves of the devices for Case A and B.

## S7. Diode parameters and parasitic resistances vs. the amount of Se

Table S7. Detailed diode parameters and parasitic resistances extracted from devices built with CISE thin films selenized with different amounts of Se.  $P_{N,RT}$  was 40 torr for all cases.

|                                        | Se amount / g |       |       |       |
|----------------------------------------|---------------|-------|-------|-------|
|                                        | 0.05          | 0.1   | 0.15  | 0.2   |
| $J_0 / \text{mA cm}^{-2}$              | 0.033         | 0.048 | 0.118 | 0.085 |
| $R_{SH} / \Omega \text{ cm}^2$         | 407.1         | 391.7 | 196.4 | 268.8 |
| $R_S / \Omega \text{ cm}^2$            | 1.68          | 1.62  | 1.70  | 1.38  |
| $K / \text{mA cm}^{-2} \text{ V}^{-m}$ | 3.092         | 3.375 | 5.416 | 4.258 |
| $m$                                    | 3.144         | 3.276 | 3.157 | 3.310 |
| $A$                                    | 1.60          | 1.65  | 1.96  | 1.74  |

S8. XRD data for the films selenized under different background pressures

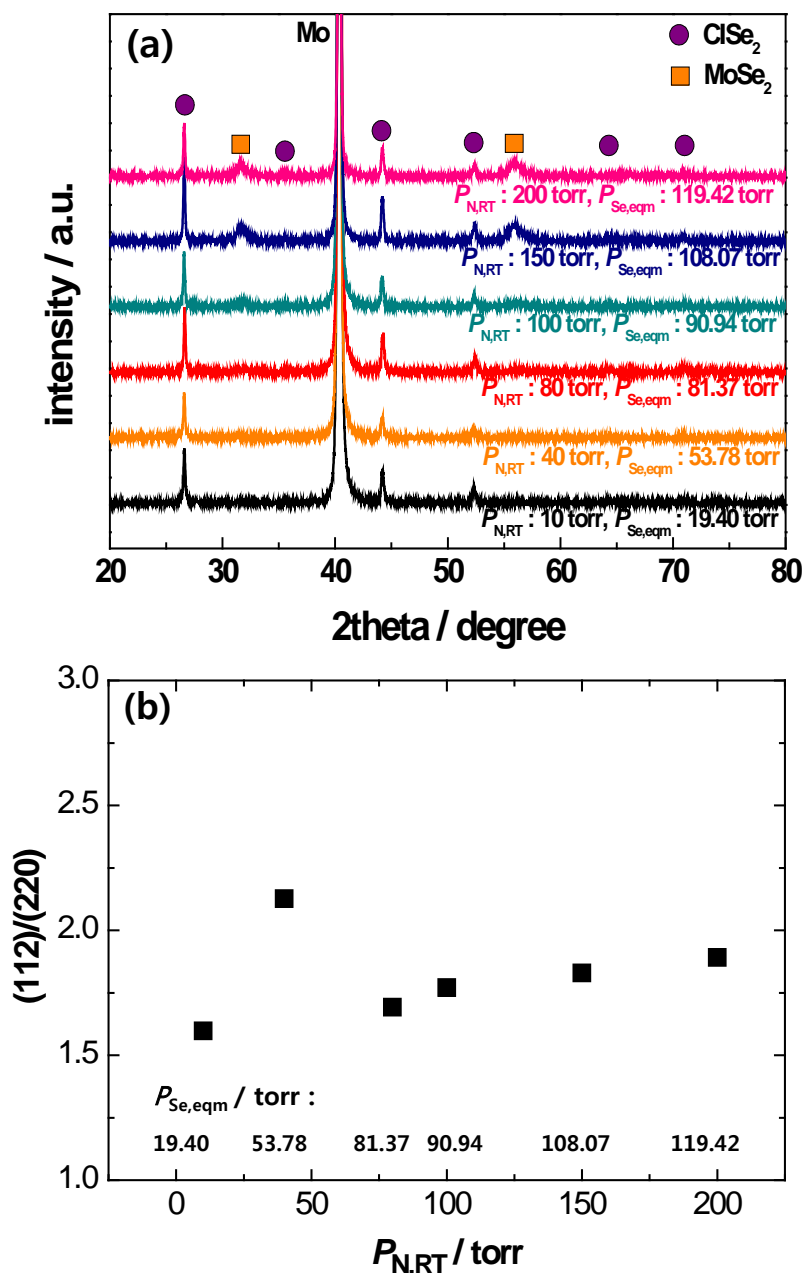

Fig. S8. (a) XRD patterns of the films selenized under different  $P_{\text{N,RT}}$ , and (b) the intensity ratio of the (112) and (220) peaks. Initial Se amount of 0.2 g for all cases.

## S9. Diode parameters and parasitic resistances vs. background pressure

Table S9. Detailed diode parameters and parasitic resistances extracted from devices built with CISE thin films selenized under different background pressures. Initial Se amount of 0.2 g for all cases.

|                                           | Background pressure at room temp. ( $P_{N,RT}$ ) / torr |       |       |       |       |       |
|-------------------------------------------|---------------------------------------------------------|-------|-------|-------|-------|-------|
|                                           | 10                                                      | 40    | 80    | 100   | 150   | 200   |
| $j_0$ / mA cm <sup>-2</sup>               | 0.098                                                   | 0.048 | 0.065 | 0.061 | 0.096 | 0.094 |
| $R_{SH}$ / $\Omega$ cm <sup>2</sup>       | 101.6                                                   | 188.7 | 251.0 | 261.0 | 162.3 | 161.2 |
| $R_S$ / $\Omega$ cm <sup>2</sup>          | 0.721                                                   | 0.553 | 0.794 | 0.962 | 0.963 | 1.12  |
| $K$ / mA cm <sup>-2</sup> V <sup>-m</sup> | 13.37                                                   | 5.26  | 4.82  | 5.61  | 11.2  | 7.98  |
| $m$                                       | 2.79                                                    | 3.12  | 3.09  | 3.13  | 2.97  | 3.19  |
| $A$                                       | 1.93                                                    | 1.93  | 1.97  | 1.89  | 1.91  | 2.05  |

## S10. Dependence of the shunt current density and $1/FF$ on the Se partial pressure

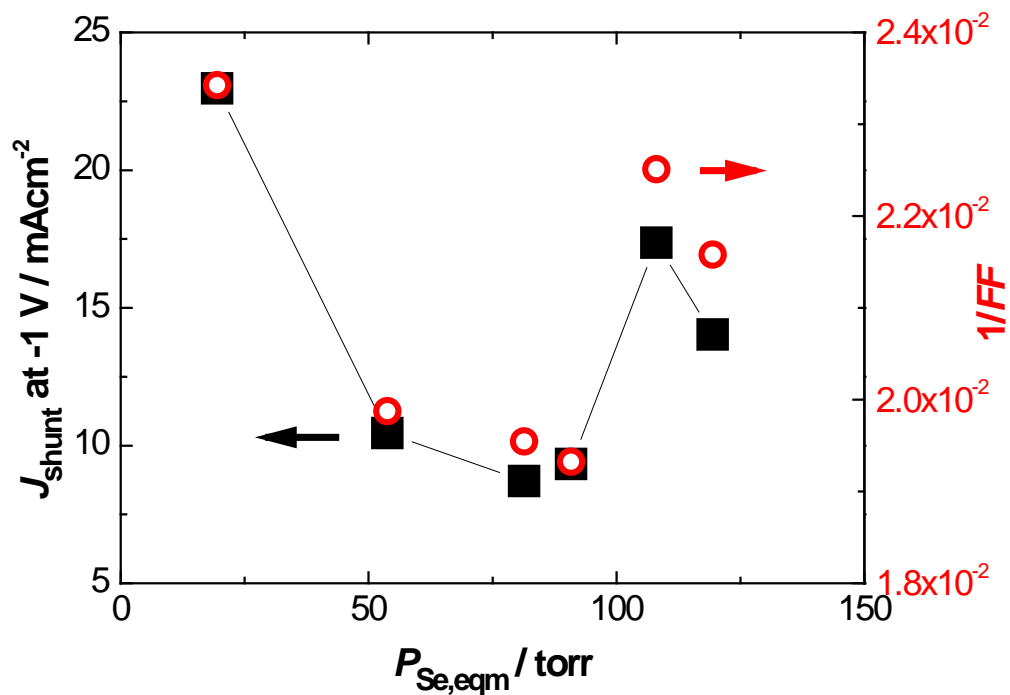

Fig. S10. Variation of the shunt current density and  $1/FF$  as a function of the Se partial pressure. Shunt current densities were measured at -1 V in dark I-V curves.

### References

1. J.J. Scragg, Studies of  $\text{Cu}_2\text{ZnSnS}_4$  films prepared by sulfurisation of electrodeposited precursors, Ph.D. thesis, University of Bath, Department of Chemistry, Bath, 2010.
